# Supplementary material for: Subnano-transformation of molybdenum carbide to oxycarbide
Source: Royal Society of Chemistry journal article supplement (doi:10.1039/d0nr04495d), 2020-01-01
Supplement: d0nr04495d1.pdf [file d0nr04495d1.pdf]

**Supporting information for**

**Subnano-transformation of Molybdenum Carbide**

**to Oxycarbide**

Masanori Wakizaka,<sup>1</sup> Augie Atqa,<sup>1</sup> Wang-Jae Chun,<sup>2</sup> Takane Imaoka,<sup>1,\*</sup>  
and Kimihisa Yamamoto<sup>1,\*</sup>

<sup>1</sup>Laboratory for Chemistry and Life Science Institute of Innovative Research,  
Tokyo Institute of Technology, Yokohama 226-8503, Japan

<sup>2</sup>Graduate School of Arts and Sciences, International Christian University, Tokyo 181-8585, Japan

Correspondence and requests for materials should be addressed to K.Y.

E-mail: yamamoto@res.titech.ac.jp

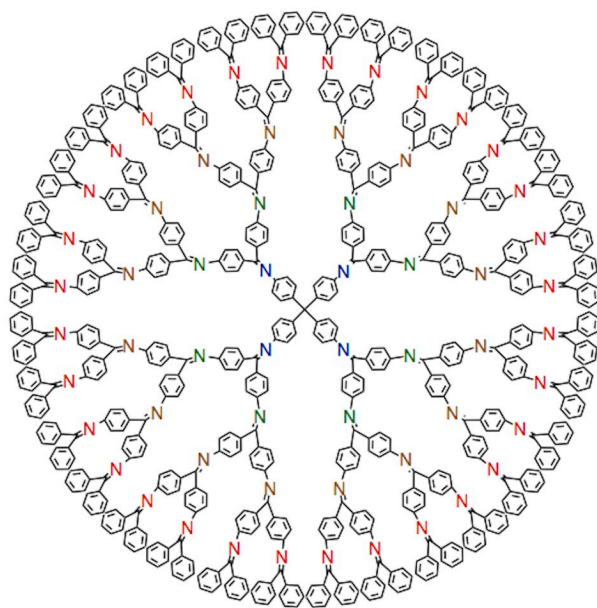

**Figure S1.** Chemical structure of the TPM-DPAG4 used for the cluster template.

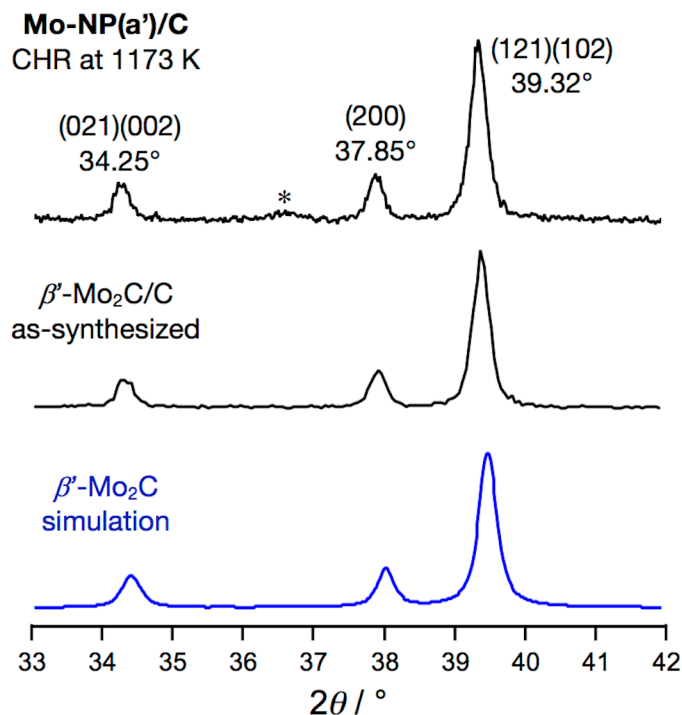

**Figure S2.** PXRD pattern of **Mo-NP(a')**/C after CHR at 1173 K for 3 h,  $\beta'$ -Mo<sub>2</sub>C/C as-synthesized from MoO<sub>3</sub> and GMC by CHR at 1173 K for 1 h, and the simulation of  $\beta'$ -Mo<sub>2</sub>C<sup>S1,S2</sup>. \*The diffraction derived from a gas barrier film.

**Equation S1.** The crystal size ( $D$ ) was estimated by Scherrer's equation, wherein  $K$ ,  $\lambda$ , and  $\beta$  refer to the dimensionless shape factor = 0.9, the wavelength of x-ray, and the peak width at half the maximum intensity, respectively.

$$D = \frac{K \lambda}{\beta \cos \theta} \quad (\text{Eq. S1})$$

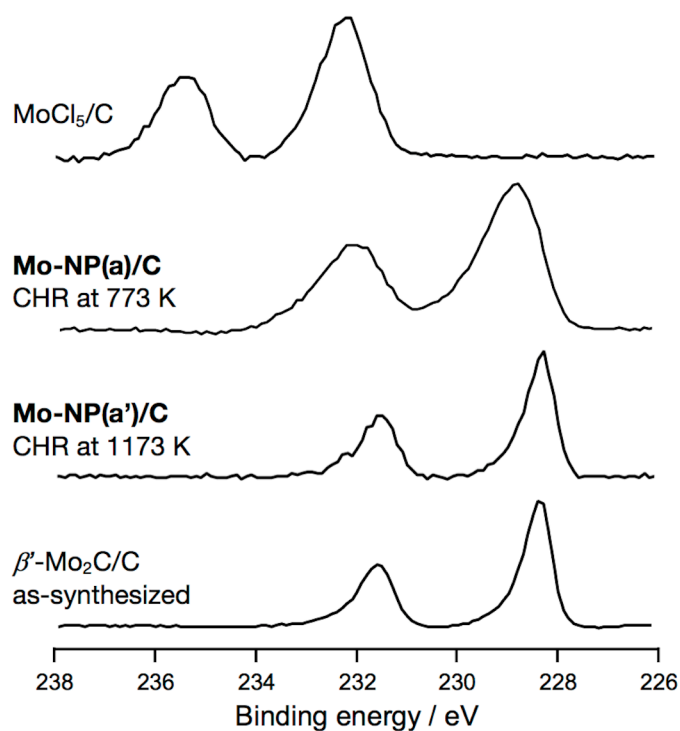

**Figure S3.** XPS spectra in the range of the binding energies for Mo 3d<sub>3/2</sub> and 3d<sub>1/2</sub> of MoCl<sub>5</sub>/C, **Mo-NP(a)/C** after CHR at 773 K for 30 min, **Mo-NP(a')/C** after CHR at 1173 K for 3 h, and β'-Mo<sub>2</sub>C/C as-synthesized from MoO<sub>3</sub> and GMC by CHR at 1173 K for 1 h. Binding energies were calibrated by setting the C 1s peak of GMC to 284.5 eV.

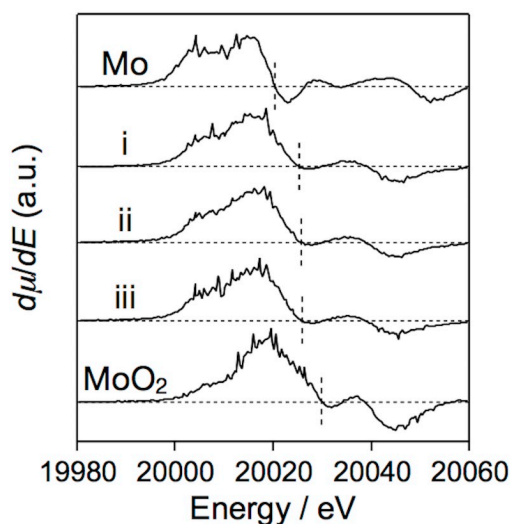

**Figure S4.** Mo-K edge XANES spectra of the first derivative for i) **Mo<sub>60</sub>-aggregated/C**, ii) **Mo-NP(b)/C**, and iii) **Mo-NP(c)/C**, after CHR at 773 K for 30 min, along with those of Mo (foil) and MoO<sub>2</sub>, measured using a Si(220) monochromator.

**Table S1.** Summary of the EXAFS curve fitting data

| Sample                              | Pair  | $N$     | Distance / Å             | $\sigma^2 / 10^{-3} \text{ Å}^2$ | $\Delta E_0 / \text{eV}$ | $R_f / \%$ |
|-------------------------------------|-------|---------|--------------------------|----------------------------------|--------------------------|------------|
| $\beta'$ -Mo <sub>2</sub> C         | Mo–Mo | 6 (set) | 2.934 <sup>a</sup> (set) | 4.1±0.4                          | 1.6±0.8                  | 0.1        |
|                                     | Mo–Mo | 6 (set) | 3.014 <sup>b</sup> (set) | 3.8±0.4                          | −4.9±0.8                 |            |
| <b>Mo<sub>60</sub>-aggregated/C</b> | Mo–Mo | 6.5±2.1 | 2.96±0.02                | 12.1±2.0                         | 0.2±2.6                  | 6.0        |
| Mo foil                             | Mo–Mo | 8 (set) | 2.73±0.01                | 4.3±0.3                          | 1.4±0.7                  | 0.4        |
|                                     | Mo–Mo | 6 (set) | 3.15±0.01                |                                  |                          |            |

An inelastic reduction factor of  $S_0^2 = 1.0$  for Mo–Mo was estimated from the amplitude of the Mo foil, in which the coordination numbers of bcc Mo are 8 and 6. All curve fitting was applied in  $k$  space ( $k = 3\text{--}14 \text{ Å}^{-1}$ ), and a Fourier filtering was applied in  $r = 2.1\text{--}3.0$  ( $\beta'$ -Mo<sub>2</sub>C),  $1.75\text{--}3.0$  (**Mo<sub>60</sub>-aggregated/C**), and  $1.8\text{--}3.4$  (Mo foil), respectively. <sup>a</sup> The average distance obtained from shorter six Mo–Mo bonds in  $\beta'$ -Mo<sub>2</sub>C, and <sup>b</sup> that obtained from longer six Mo–Mo bonds in  $\beta'$ -Mo<sub>2</sub>C.<sup>S1,S2</sup>

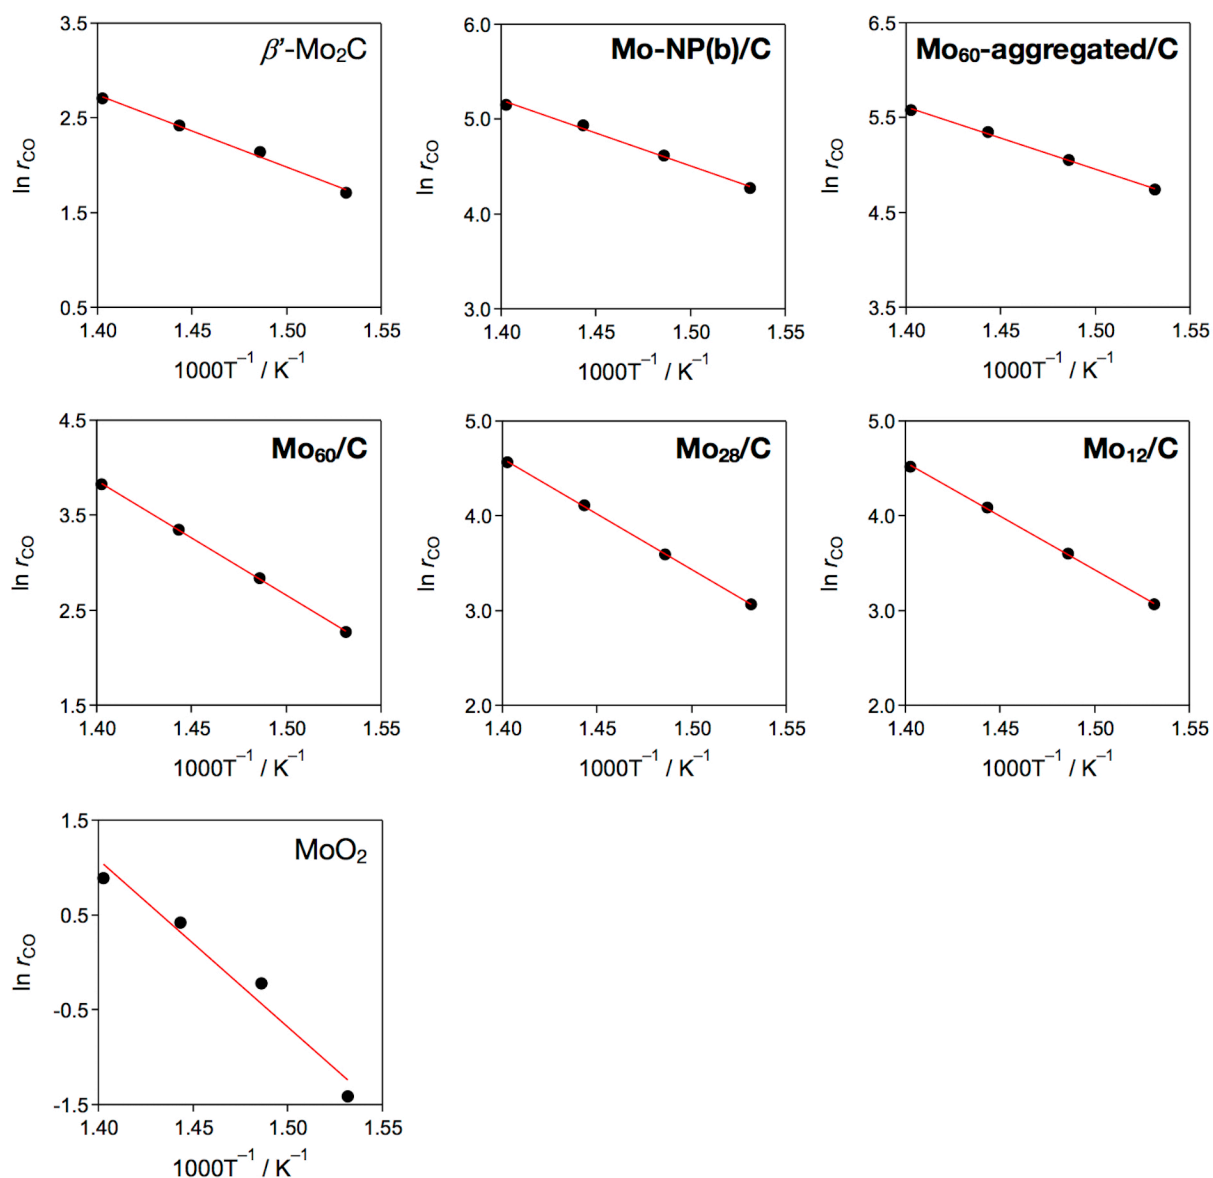

**Figure S5.** Arrhenius plots for RWGS reactions using  $\beta'$ -Mo<sub>2</sub>C, Mo-NP(b)/C, Mo<sub>60</sub>-aggregated/C, Mo<sub>60</sub>/C, Mo<sub>28</sub>/C, Mo<sub>12</sub>/C, and MoO<sub>2</sub> as the catalyst under H<sub>2</sub>/CO<sub>2</sub> (1/1, 1 atm) at 713, 693, 673, and 653 K.

**Table S2.** Summary of the RWGS data

| Catalyst                            | $d$ / nm | $r_{\text{CO}}$ / mol <sub>CO</sub> mol <sub>Mo</sub> <sup>-1</sup> h <sup>-1a</sup> | $S_{\text{CO}}$ / % <sup>c</sup> | $S_{\text{CH}_4}$ / % <sup>d</sup> | $E_a$ / kJ mol <sup>-1e</sup> |
|-------------------------------------|----------|--------------------------------------------------------------------------------------|----------------------------------|------------------------------------|-------------------------------|
| $\beta'$ -Mo <sub>2</sub> C         | bulk     | 15.1                                                                                 | 99.8                             | 0.2                                | 64±4                          |
| <b>Mo-NP(b)/C</b>                   | 1.4±0.5  | 174 <sup>b</sup>                                                                     | 99.9                             | 0.1                                | 57±3                          |
| <b>Mo<sub>60</sub>-aggregated/C</b> | 1.9±0.7  | 265 <sup>b</sup>                                                                     | 99.9                             | 0.1                                | 54±2                          |
| <b>Mo<sub>60</sub>/C</b>            | 1.2±0.3  | 46.2 <sup>b</sup>                                                                    | 99.8                             | 0.2                                | 100±1                         |
| <b>Mo<sub>28</sub>/C</b>            | 1.0±0.3  | 96.2 <sup>b</sup>                                                                    | 99.9                             | 0.1                                | 97±1                          |
| <b>Mo<sub>12</sub>/C</b>            | 0.8±0.2  | 92.0 <sup>b</sup>                                                                    | 99.9                             | 0.1                                | 94±2                          |
| MoO <sub>2</sub>                    | bulk     | 2.4                                                                                  | ~100                             | ~0                                 | 147±20                        |

<sup>a</sup> The generation rate for CO at 713 K. <sup>b</sup> Loading amount of Mo before CHR at 773 K for 30 min.

<sup>c</sup> Selectivity for CO. <sup>d</sup> Selectivity for CH<sub>4</sub>. The amount of C<sub>2</sub>H<sub>4</sub> and C<sub>2</sub>H<sub>6</sub> was below detection limit. <sup>e</sup> The activation energy was obtained from the  $r_{\text{CO}}$  at 713, 693, 673, and 653 K.

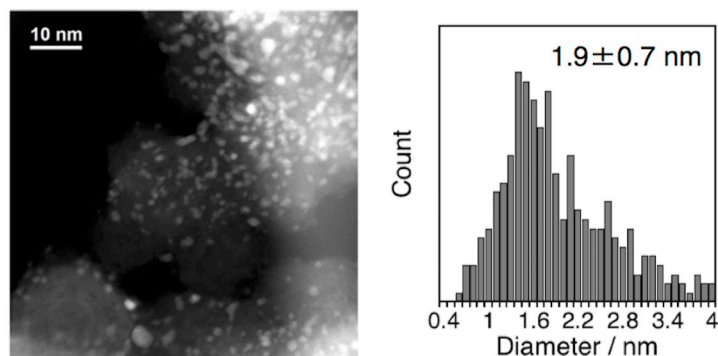

**Figure S6.** A HAADF-STEM image and a histogram of the particle size distribution of a **Mo<sub>60</sub>-aggregated/C** after CHR at 773 K for 30 min.

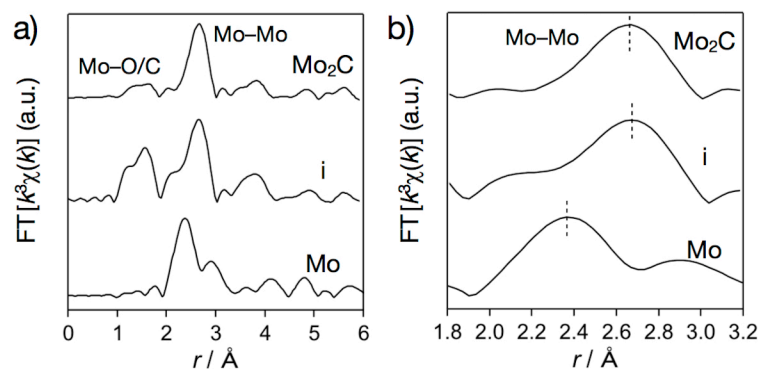

**Figure S7.** Mo–K edge EXAFS spectra of a) Full range EXAFS spectra and b) magnification of the EXAFS spectra in the region  $r = 1.8\text{--}3.2\text{\AA}$  for i) **Mo<sub>60</sub>-aggregated/C** after CHR at 773 K for 30 min, together with those of Mo (foil) and  $\beta'$ -Mo<sub>2</sub>C.



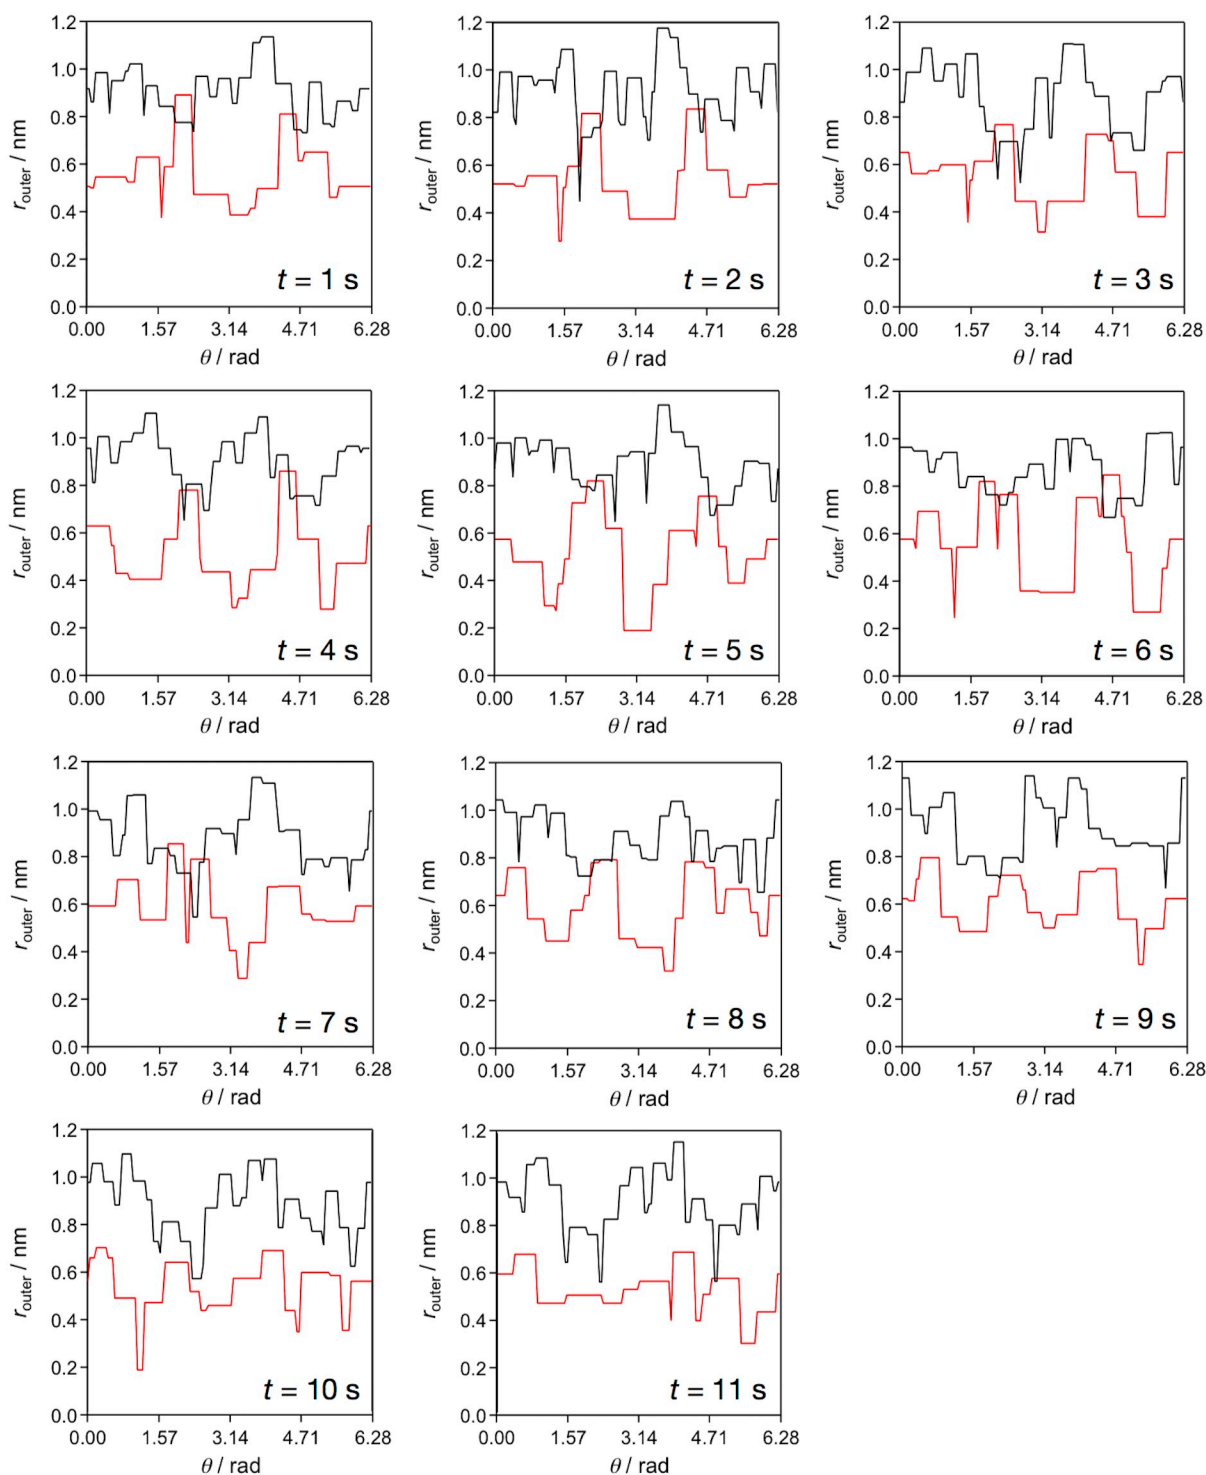

**Figure S8.** Contour graphs of the polar coordinate with a resolution of 0.05 rad (126 points total) at  $t = 1\text{--}11\text{ s}$  for a) a Mo oxycarbide cluster (red lines) and b) a Mo carbide nanoparticle (black lines) after CHR at 773 K for 30 min, obtained from continuous time-course high-resolution HAADF-STEM images over 11 seconds using an accelerating voltage of 200 kV.

**Equation S2.**  $\Delta\theta$  values were estimated by the following equation, wherein  $R$  and  $r$  refer to the atomic radius of Mo and the distance between the center of gravity of a particle and the center of Mo atoms, respectively.

$$\Delta\theta = 2 \tan^{-1} \frac{R}{r} \quad (\text{Eq. S2})$$

## Methods

**Synthesis of  $\beta'$ -Mo<sub>2</sub>C/C.** MoO<sub>3</sub> (20 mg) and GMC (20 mg) were grided and mixed in an agate mortar. After applying CHR at 1173 K for 1 h under an H<sub>2</sub> (100 mL min<sup>-1</sup>) atmosphere on a quartz boat, a black powder ( $\beta'$ -Mo<sub>2</sub>C/C) was obtained.

**XAFS analyses.**<sup>S3</sup> XAFS analyses were carried out using Athena and Artemis<sup>S4</sup> equipped with ATOMS<sup>S5</sup> and FEFF6<sup>S6</sup> in the software package Demeter 0.9.26. XAFS oscillations  $\chi(k)$  were extracted using spline smoothing with a Cook-Sayers criterion. The oscillations were normalized using an edge height with its energy dependence. The origin for the photoelectron kinetic energies ( $E_0$ ) were set at the inflection point of the absorption edge. The curve fitting for EXAFS was applied in  $k$  space ( $k = 3\text{--}14 \text{ \AA}^{-1}$ ) with equations S3 and S4:

$$\chi(k) = S_0^2 \sum_i \frac{N_i F_i(k) \exp(-2k_i^2 \sigma_i^2)}{k_i r_i^2} \sin\{2k_i r_i + \phi_i(k_i)\} \quad (\text{Eq. S3})$$

$$k_i = \sqrt{\frac{2m_e}{\hbar} (E - E_0 - \Delta E_{i0})} \quad (\text{Eq. S4})$$

where  $S_0^2$ ,  $N_i$ ,  $\sigma_i$ ,  $r_i$ ,  $F_i(k_i)$ ,  $\phi_i(k_i)$ , and  $\Delta E_{i0}$  represent the inelastic reduction factor, the coordination number, the Debye-Waller factor, and the bond distance, the backscattering factor, the phase shift, and the difference between experimentally determined  $E_0$  and that used for the theoretical calculation for the  $i^{\text{th}}$  shell, respectively.  $F_i(k_i)$  and  $\phi_i(k_i)$  were calculated using FEFF6. FEFF calculations were carried out using a Hedin-Lundqvist potential with maximum effective distance of 3.5 Å for Mo–Mo bonds, and the paths of the single scattering were applied. In each beamline,  $S_0^2 = 1.0$  for Mo–Mo was estimated by using Mo foil, where the coordination numbers are 8 and 6 of bcc Mo. A goodness of the curve fit ( $R_f$ ) was estimated from equation S5:

$$R_f = \sqrt{\frac{\sum_i k^n \{\chi_i^{\text{data}}(k) - \chi_i^{\text{fit}}(k, [\alpha])\}^2}{\sum_i \{k^n \chi_i^{\text{data}}(k)\}^2}} \quad (\text{Eq. S5})$$

where  $\chi_i^{\text{data}}$ ,  $\chi_i^{\text{fit}}$ , and  $[\alpha]$  reflect the EXAFS functions from measurements, those from calculations, and the fitting parameters, respectively.

**Reverse water gas shift reactions.** 10–20 mg of the catalyst samples were added into the quartz vessels, respectively. Those samples were pretreated under  $\text{H}_2$  flow (1 atm) at 773 K for 10 min, subsequently pretreated under  $\text{H}_2/\text{CO}_2$  (1/1) flow (1 atm, 20 mL min<sup>-1</sup>) at 713 K for 1 h. Then, 50–200  $\mu\text{L}$  of the gas samples were extracted using a gas tight syringe after waiting for 20 min every temperature (713, 693, 673, and 653 K), respectively. Those gas samples were analyzed by gas chromatography mass spectrometry (Shimadzu GC-MS QP2020) with a molecular sieve 5A capillary column (Agilent technologies). The amount of CO and  $\text{CH}_4$  were detected for  $m/z = 28$  and 15 at the retention time = 1.2 and 0.9 min, respectively, and quantified using those standard gases.

## References.

- S1. T. Ya. Velikanova, V. Z. Kublii and B. V. Khaenko, *Sov. Powder Metall. Met. Ceram.* 1988, **27**, 891.
- S2. Y. Xu, M. Yamazaki and P. Villars, *Jpn. J. Appl. Phys.* 2011, **50**, 11RH02.
- S3. The Japanese XAFS society, *Foundations and Applications of XAFS*, Kodansha Ltd. 2017, Chapter 3.
- S4. B. Ravela and M. Newville, *J. Synchrotron Rad.* 2005, **12**, 537.
- S5. B. Ravel, *J. Synchrotron Rad.* 2001, **8**, 314.
- S6. M. Newville, *J. Synchrotron Rad.* 2001, **8**, 322.
